# Supplementary material for: Novel 4-nitroimidazole analogues: Synthesis, in vitro biological evaluation, in silico studies and molecular dynamics simulation
Source: Research Square preprint supplement (doi:10.21203/rs.3.rs-3214335/v1), 2023-08-03
Supplement: Supplementary file 1 [file 57d3a9b84c6b2638a34bc5e5.docx]

**Supplementary data**

**Novel 4-nitroimidazole analogues: Synthesis, biological evaluation and molecular dynamics simulation**

Yaseen A. Al-Soud,1,* Sondos O. Al-Sawakhnah,1 Raed A. Al-Qawasmeh,2 Najim A. Al-Masoudi,3,* Ala’a H. Al-Ahmad, Lamia Al-Maliki,4 Lasse van Geelen,5 Rainer Kalscheuer,5 Bahjat A. Saeed,6 Amneh Shtaiwi, & Holger Stark7

1. Department of Chemistry, College of Science, University of Al al-Bayt, Al-Mafraq, Jordan

2. Department of Chemistry, College of Sciences, University of Sharjah, Sharjah 27272, UAE

3. Department of Chemistry, College of Science, University of Basrah, Basrah, Iraq.

Present address: 78464 Konstanz, Germany

4 Department of Molecular and Medical Biotechnology, Al-Nahrain University, Baghdad, Iraq.

5. Institute of Pharmaceutical Biology and Biotechnology, Heinrich- Heine -University Düsseldorf, 40225

Duesseldorf, Germany

6. Department of Chemistry, College of Education of Applied Science, University of Basrah, Basrah, Iraq.

7. Faculty of Pharmacy, Middle East University, Queen Alia Airport Street, 11610 Amman, Jordan.

8. Institute ofPharmaceutical and Medicinal Chemistry, Heinrich- Heine -University Düsseldorf, Universitaetsstr. 1, 40225 Duesseldorf, Germany

**Table 2**. *In vitro* antiviral activity and cytotoxicity of compounds **7-18** in the virus host cell lines.

| EC50 (μM) CC50 (μM)    HEL-299 Hep3B MDCK Hep2 VeroE6 | | | | | | |
| --- | --- | --- | --- | --- | --- | --- |
| **7** | > 50 | > 50 | > 50 | > 50 | > 50 | > 50 |
| **8** | > 50 | > 50 | > 50 | 25.0 | > 50 | > 50 |
| **9** | > 50 | > 50 | > 50 | > 50 | > 50 | > 50 |
| **10** | > 50 | > 50 | > 50 | > 50 | 20.9 | > 50 |
| **11** | > 50 | > 50 | > 50 | > 50 | > 50 | > 50 |
| **12** | > 50 | > 50 | > 50 | > 50 | > 50 | > 50 |
| **13** | > 50 | > 50 | > 50 | > 50 | 29.2 | > 50 |
| **14** | > 50 | > 50 | > 50 | > 50 | > 50 | > 50 |
| **15** | > 50 | > 50 | > 50 | > 50 | 23.7 | > 50 |
| **16** | > 50 | > 50 | > 50 | > 50 | > 50 | > 50 |
| **17** | > 50 | 4.8 | 2.6 | 5.7 | 25.7 | 18.8 |
| **18** | > 50 | 25.1 | 7.7 | 24.3 | 24.7 | 20.3 |
| Remdesivir |  | > 10 (0.09)* | > 10 (0.01)* | - | > 10 (0.08)* | - |
| Ribavirin |  | > 250 | - | 80.2±18.6 (5.2)* | - | - |

* EC50 ((μM)

**IR and NMR and DEPT spectra**


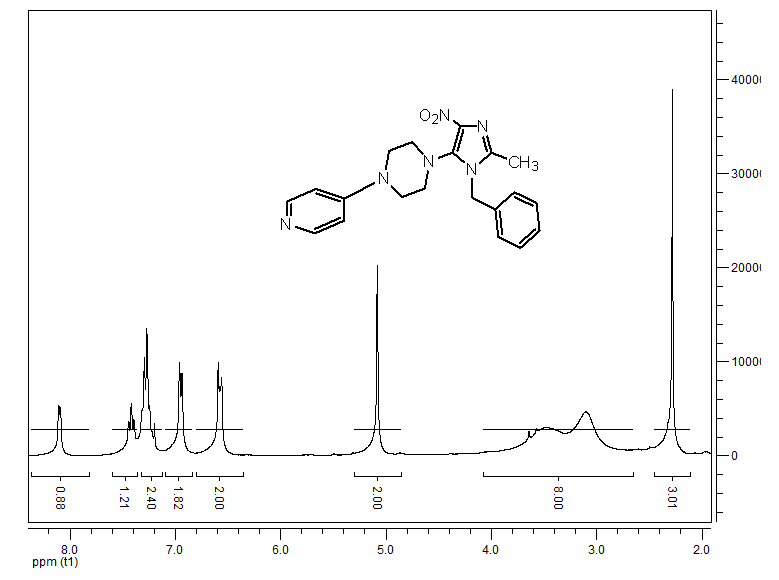


**Fig. S1**. 1H NMR spectrum of **7**


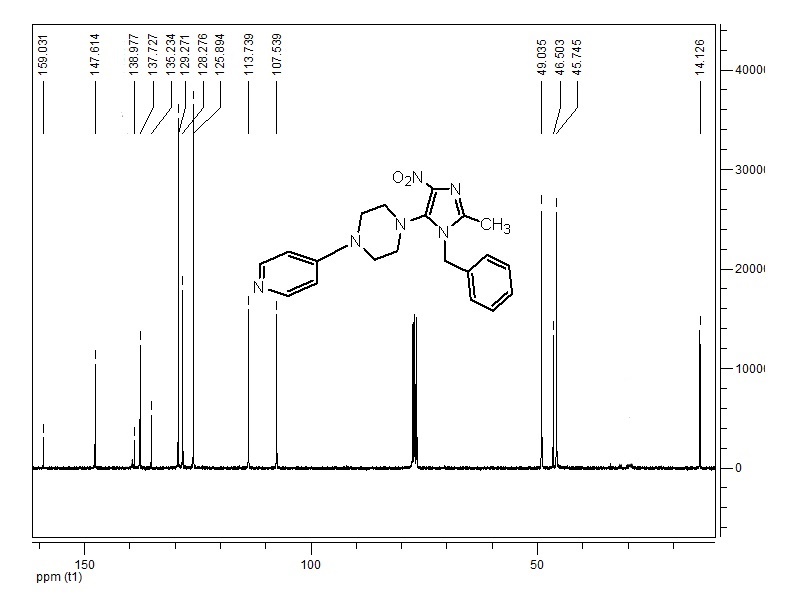


**Fig. S2**. 13C NMR spectrum of **7**


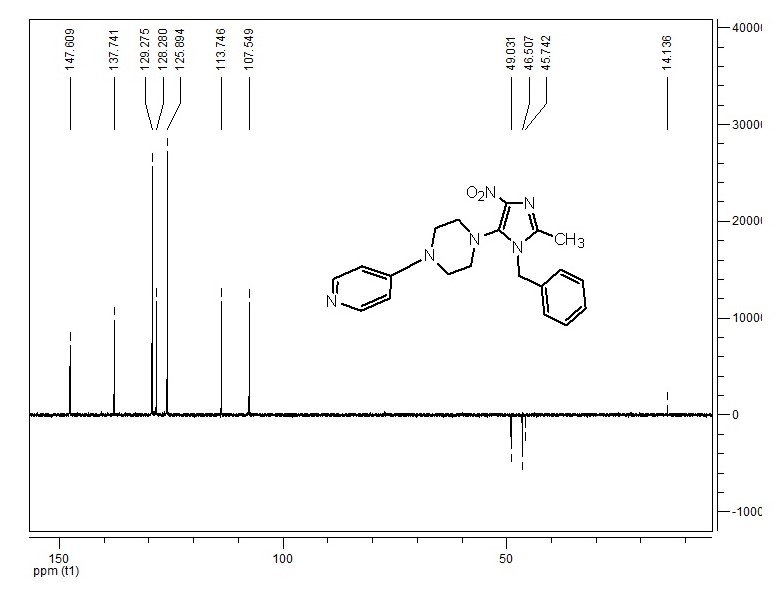


**Fig. S3**. DPET NMR spectrum of **7**


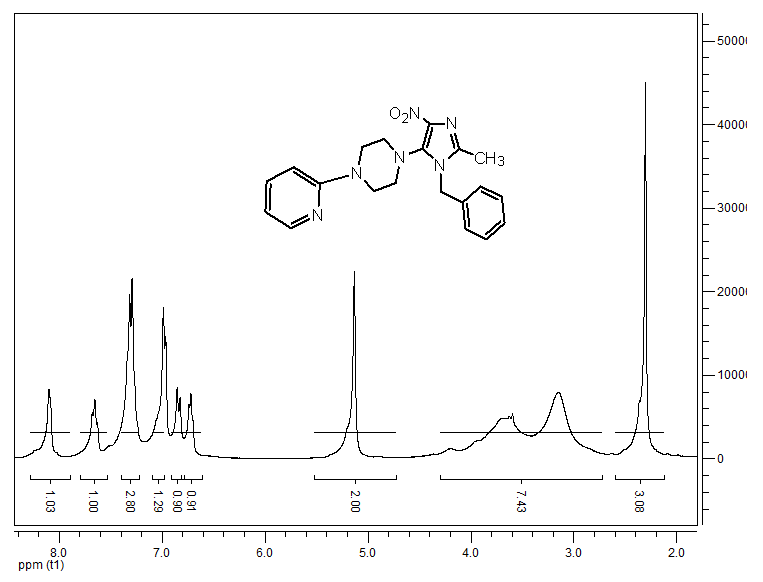


**Fig. S4**. 1H NMR spectrum of **8**


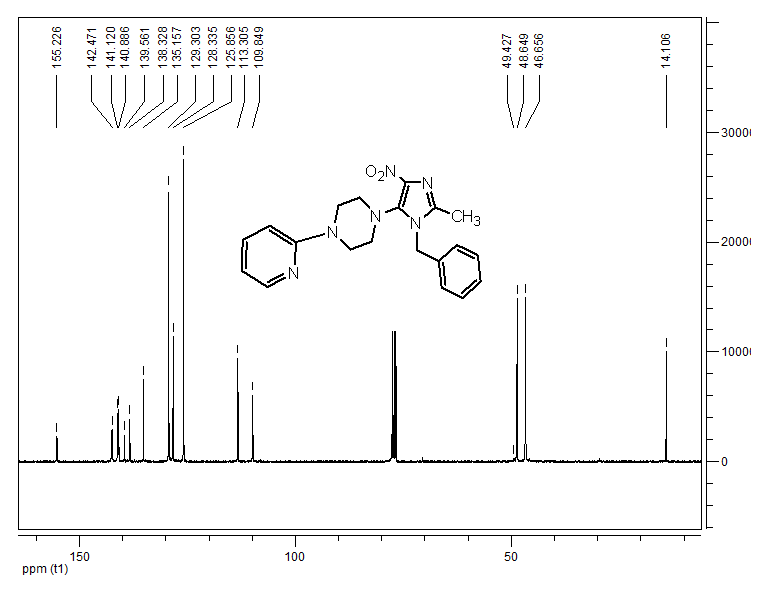


**Fig. S5**. 13C NMR spectrum of **8**


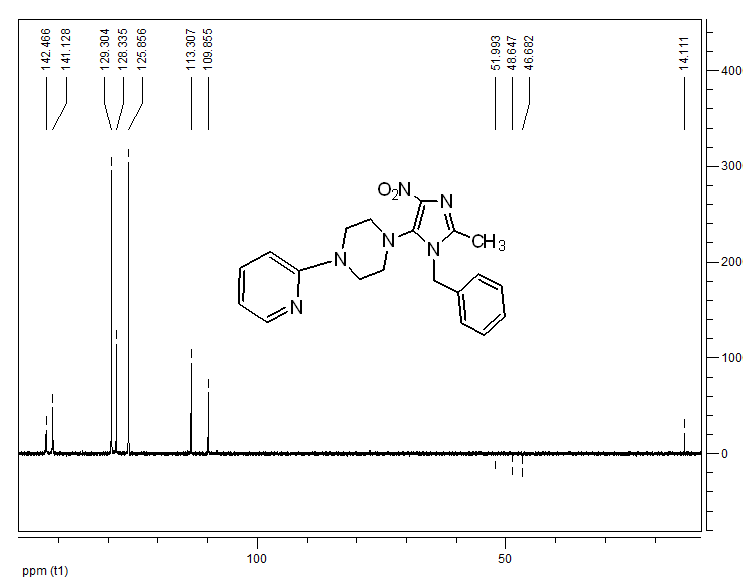


**Fig. S6**. DPET NMR spectrum of **8**


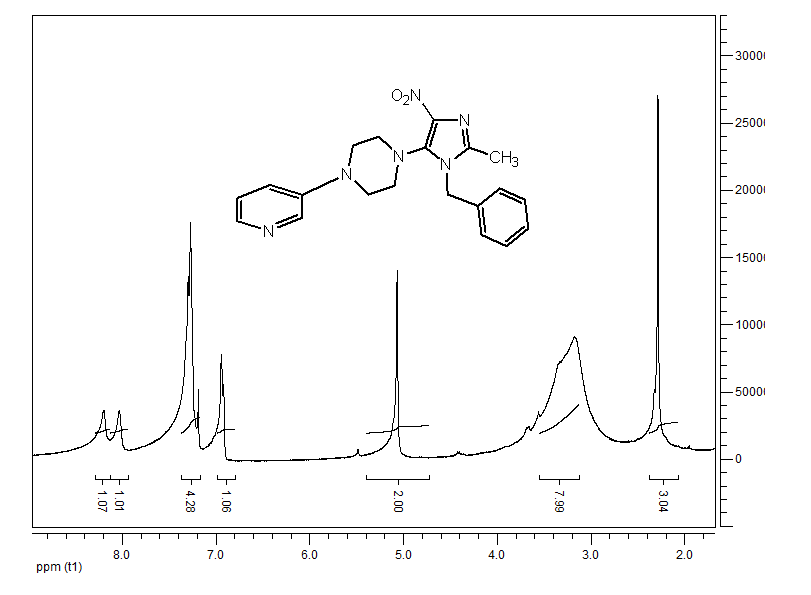


**Fig. S7**. 1H NMR spectrum of **9**


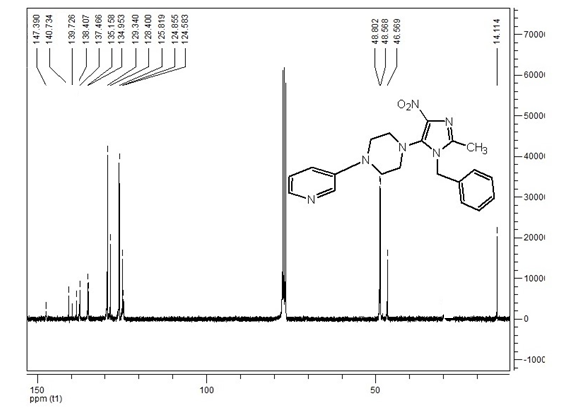


**Fig. S8**. 13C NMR spectrum of **9**


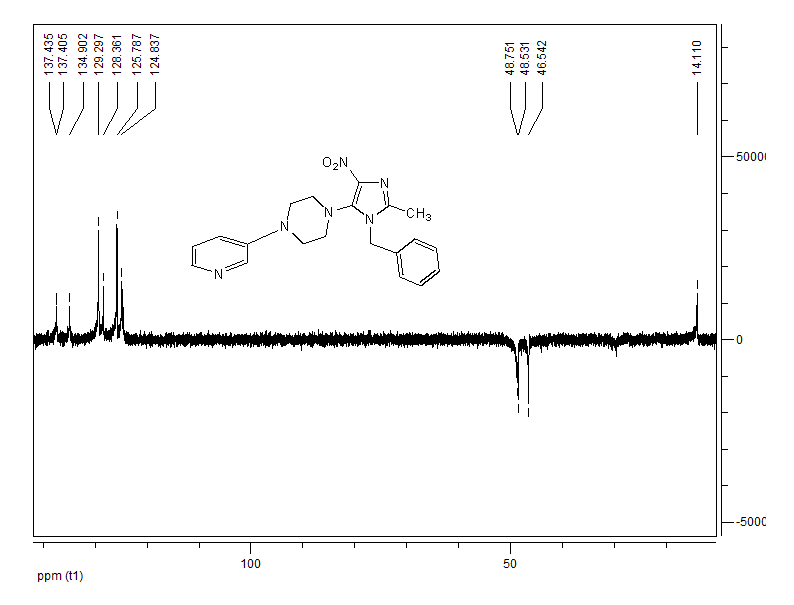


**Fig. S9**. DPET NMR spectrum of **9**


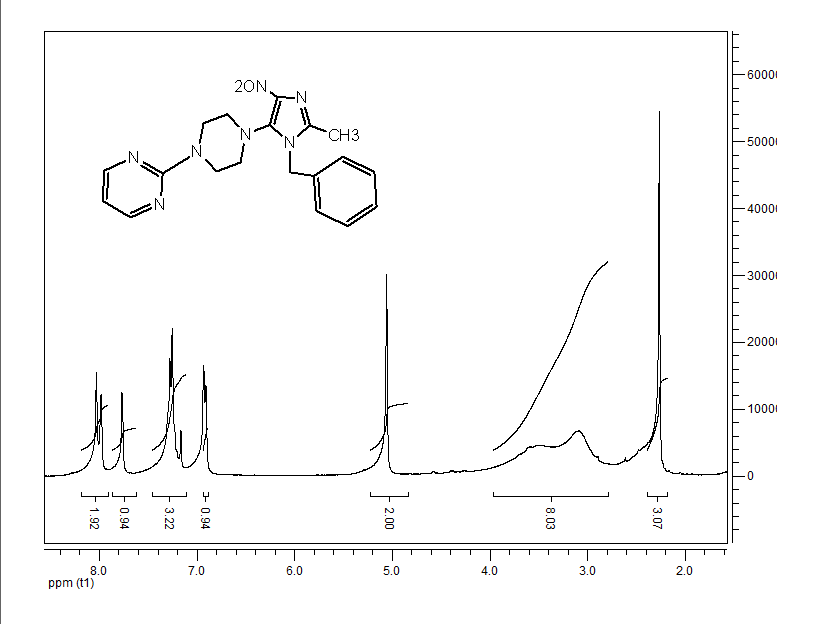


**Fig. S10**. 1H NMR spectrum of **10**


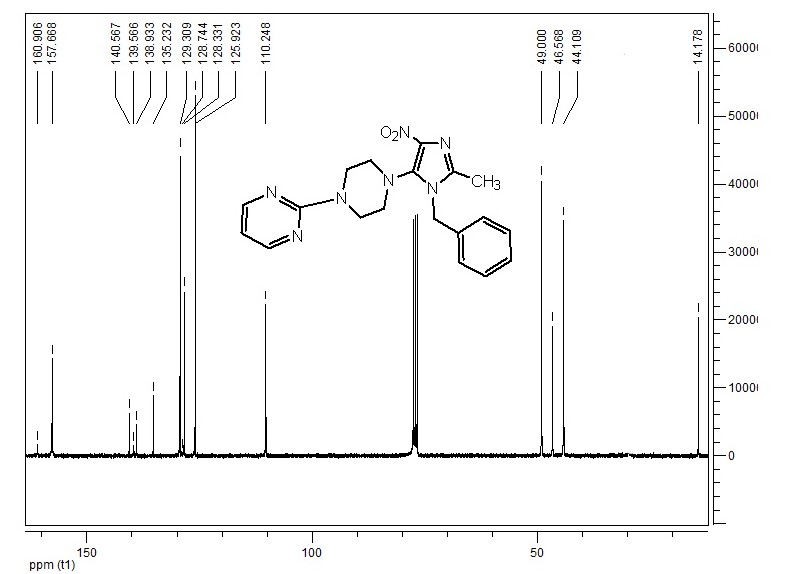


**Fig. S11**. 13C NMR spectrum of **10**


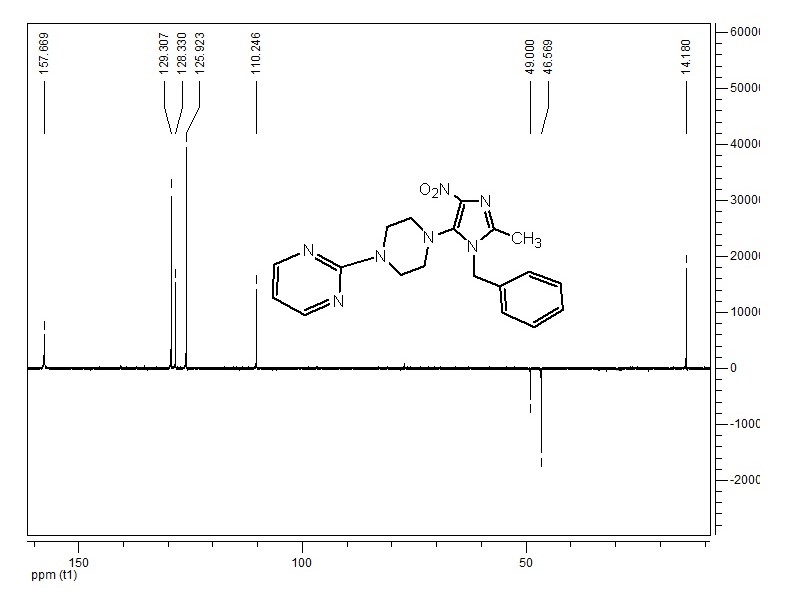


**Fig. S12**. DPET NMR spectrum of **10**


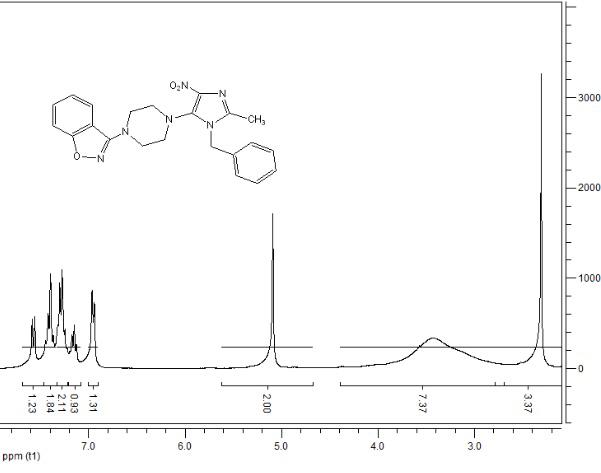


**Fig. S13**. 1H NMR spectrum of **11**


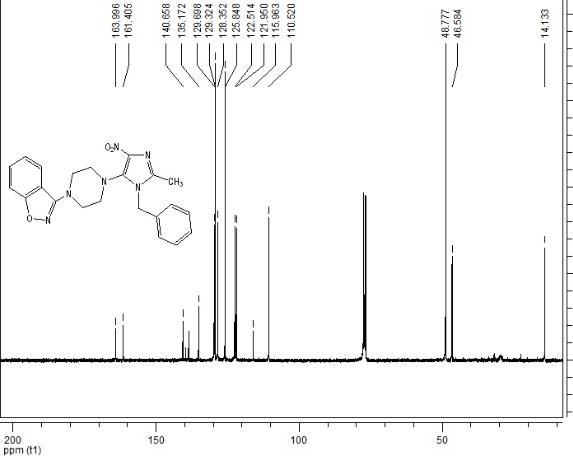


**Fig. S14**. 13C NMR spectrum of **11**


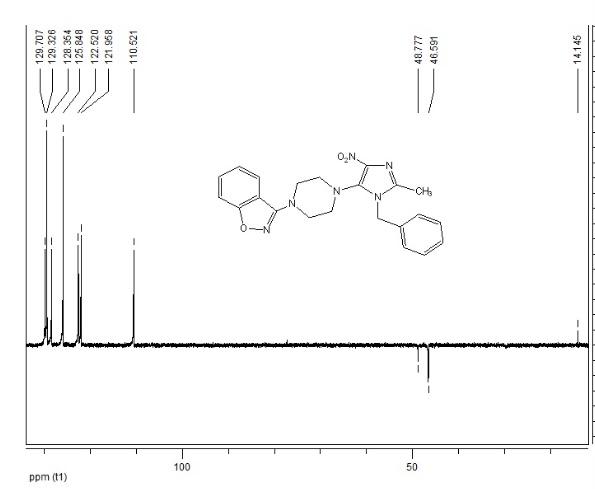


**Fig. S15**. DPET NMR spectrum of **11**


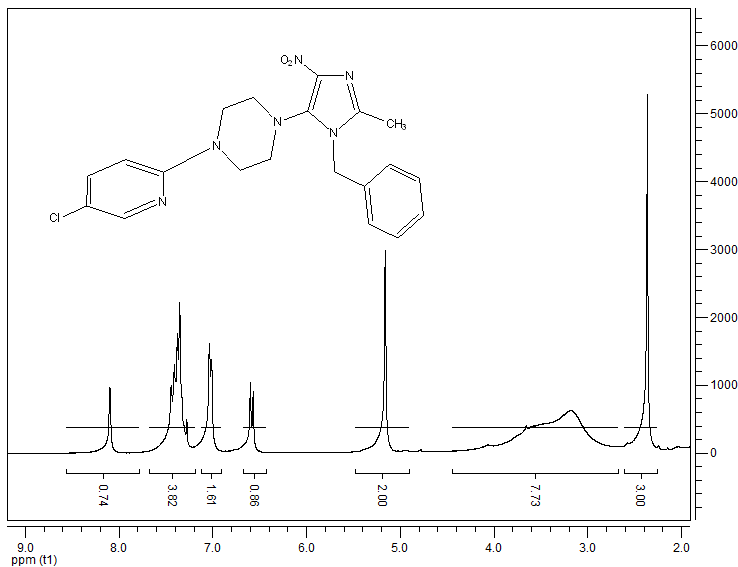


**Fig. S16**. 1H NMR spectrum of **12**


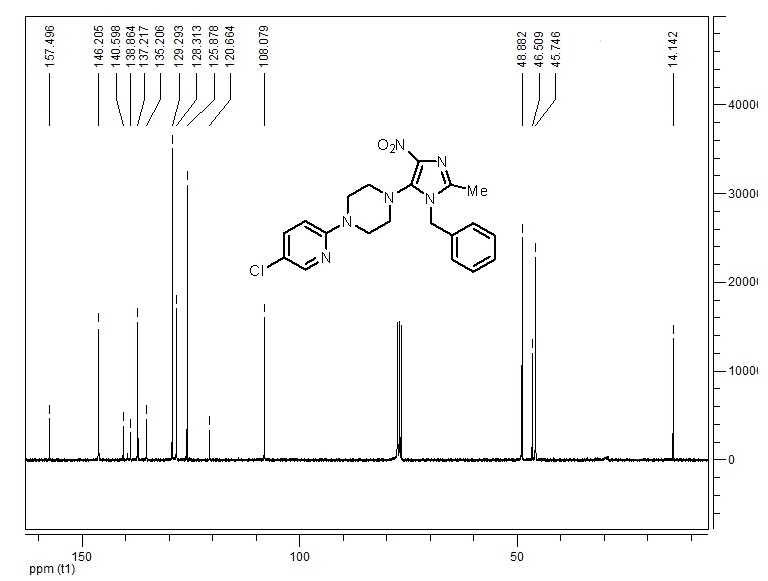


**Fig. S17**. 13C NMR spectrum of **12**


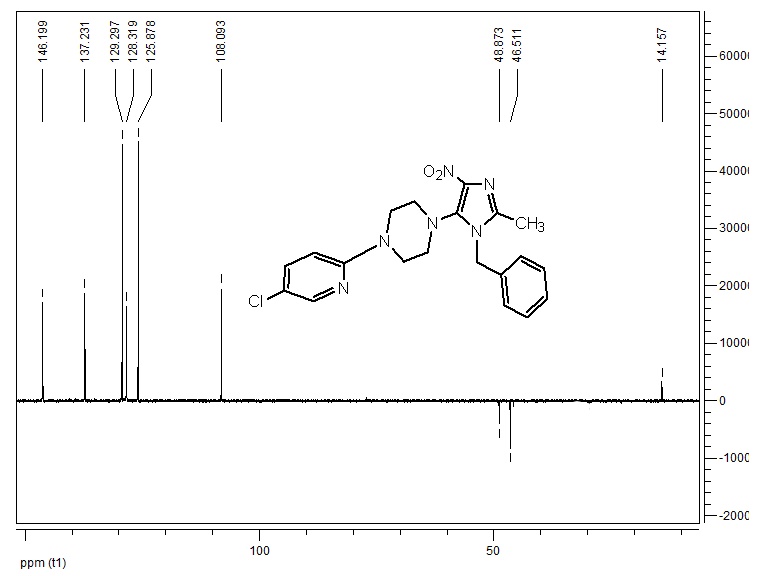


**Fig. S18**. DPET NMR spectrum of **12**


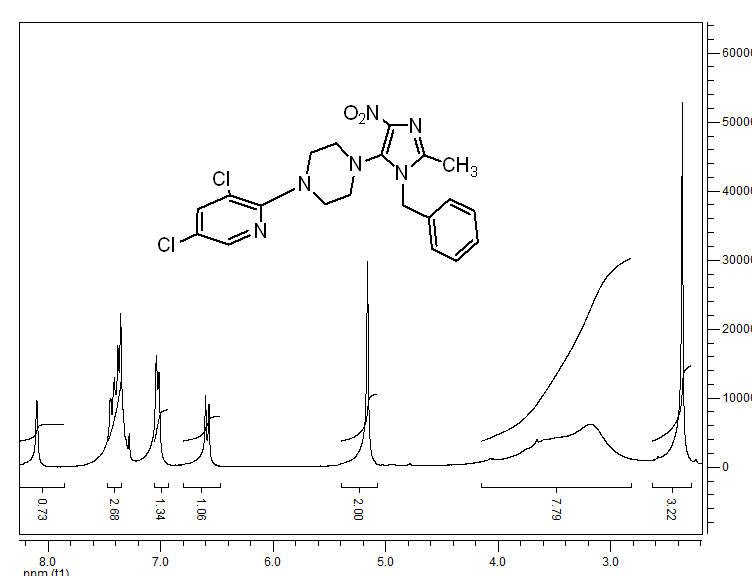


**Fig. S19**. 1H NMR spectrum of **13**


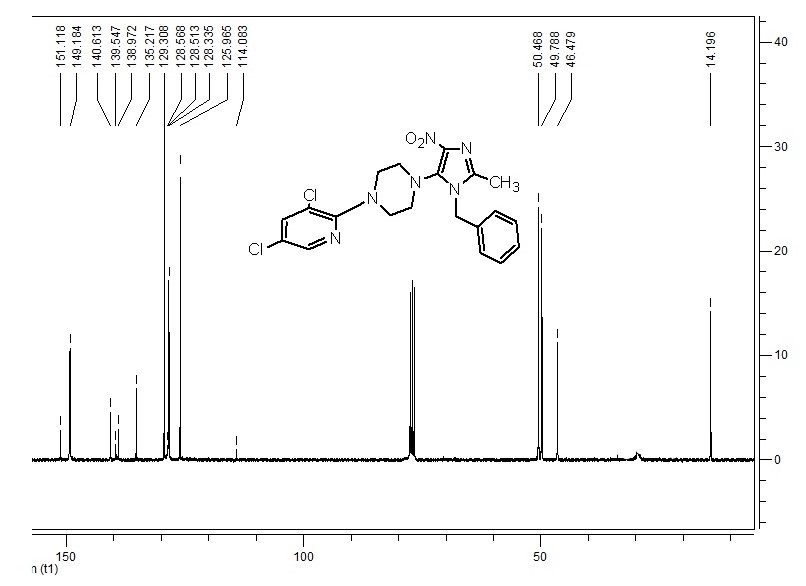


**Fig. S20**. 13C NMR spectrum of **13**


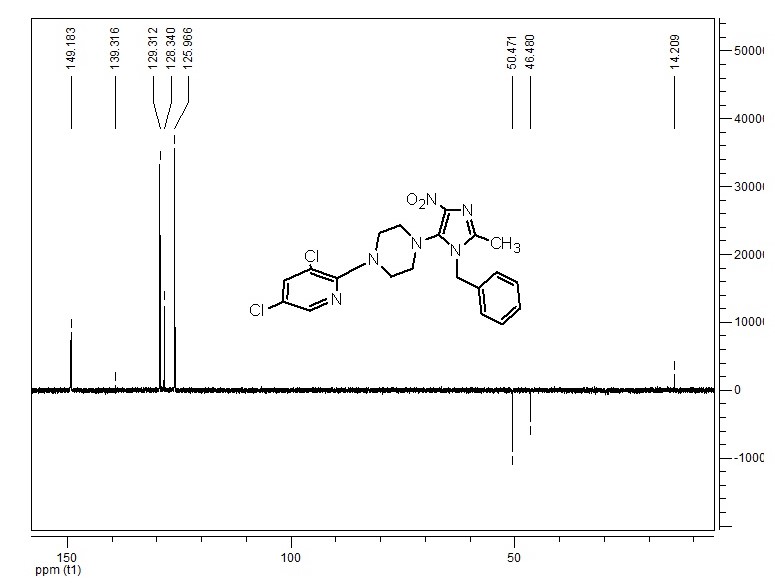


**Fig. S21**. DPET NMR spectrum of **13**


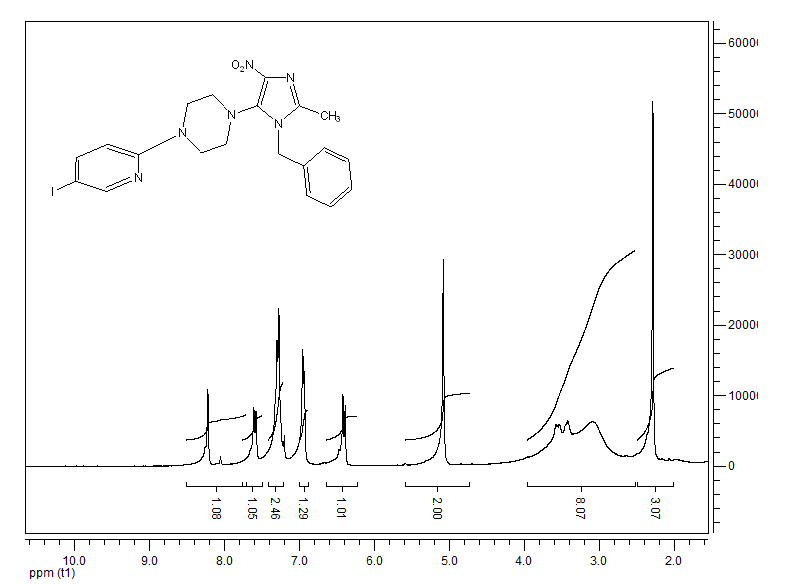


**Fig. S22**. 1H NMR spectrum of **14**


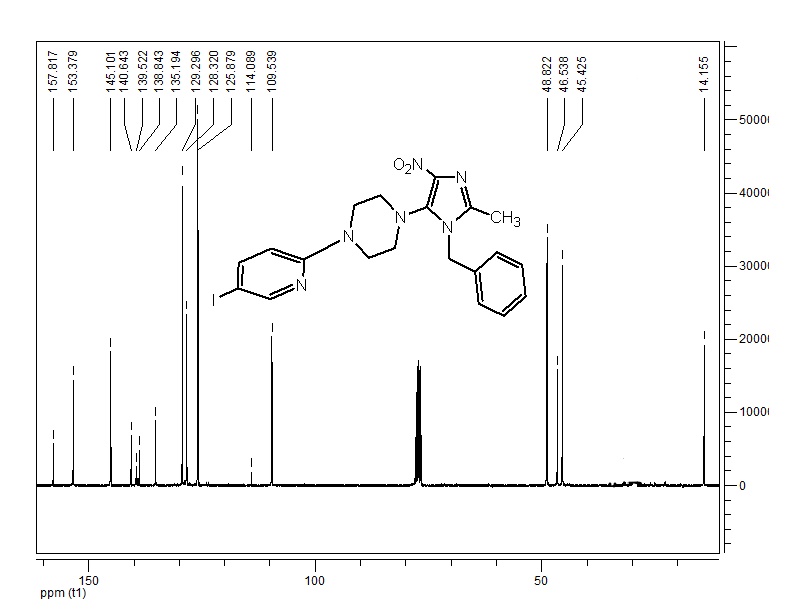


**Fig. S23**. 13C NMR spectrum of **14**


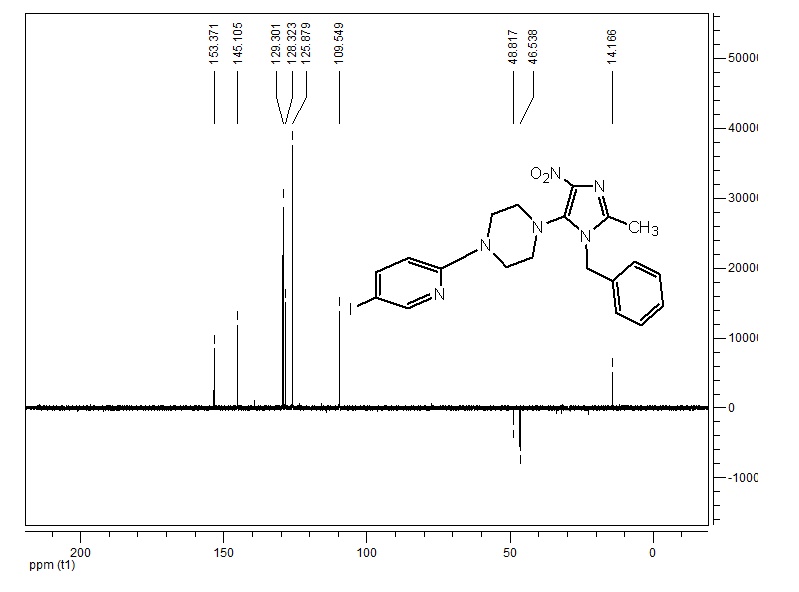


**Fig. S24**. DPET NMR spectrum of **14**


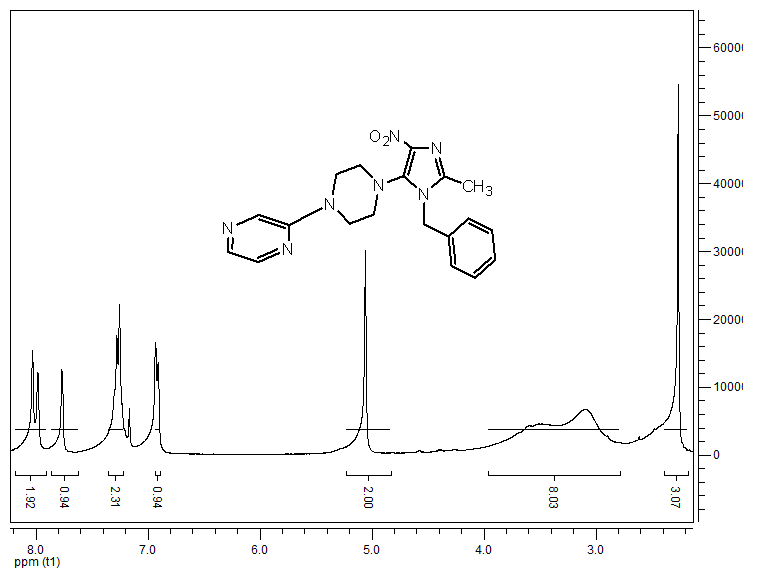


**Fig. S25**. 1H NMR spectrum of **15**


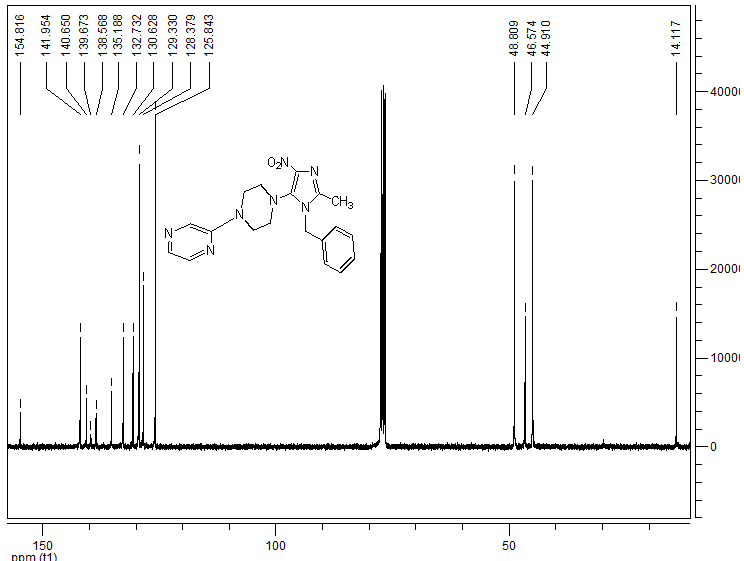


**Fig. S26**. 13C NMR spectrum of **15**


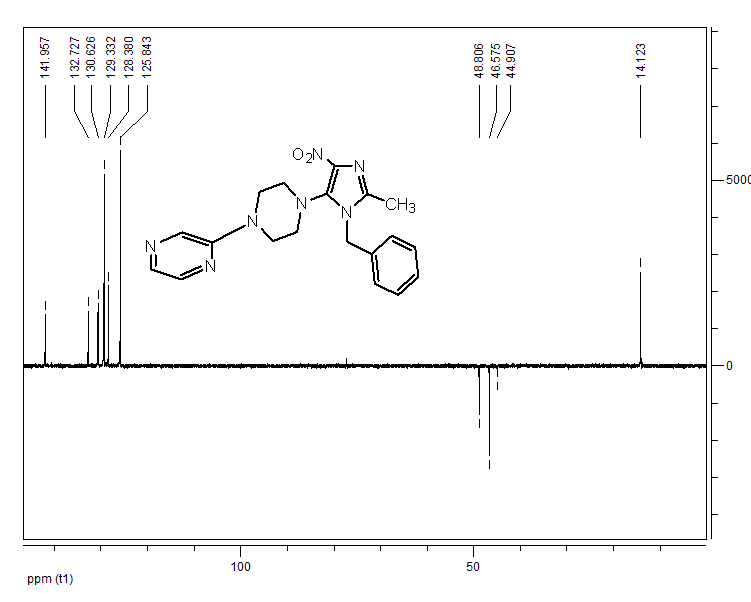


**Fig. S27**. DPET NMR spectrum of **15**


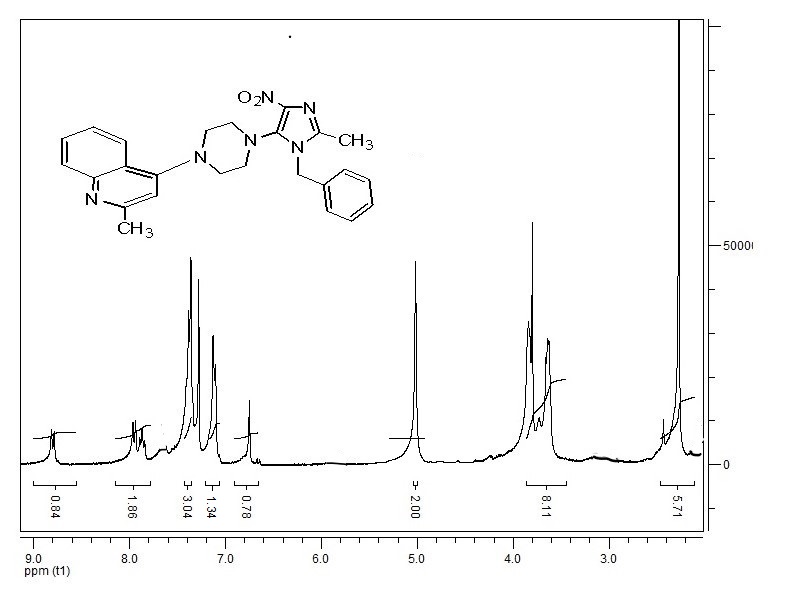


**Fig. S28**. 1H NMR spectrum of **16**


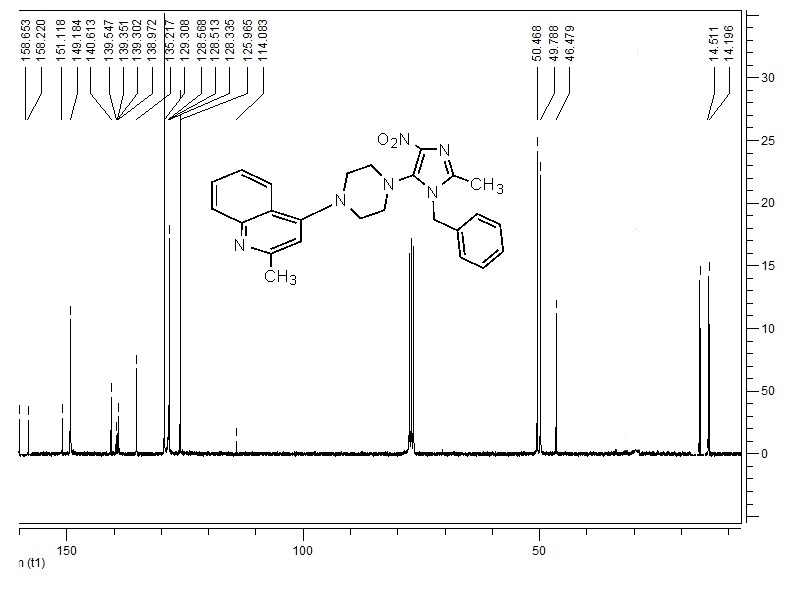


**Fig. S29**. 13C NMR spectrum of **16**


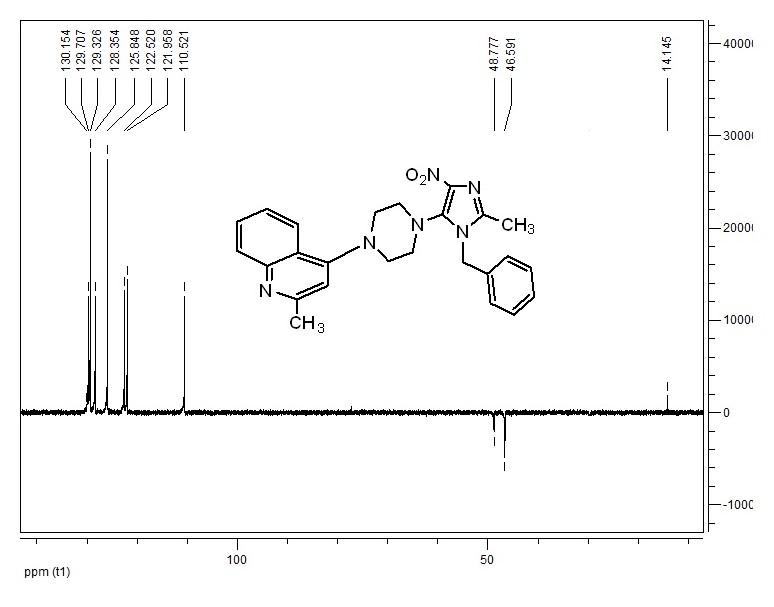


**Fig. S30**. DPET NMR spectrum of **16**


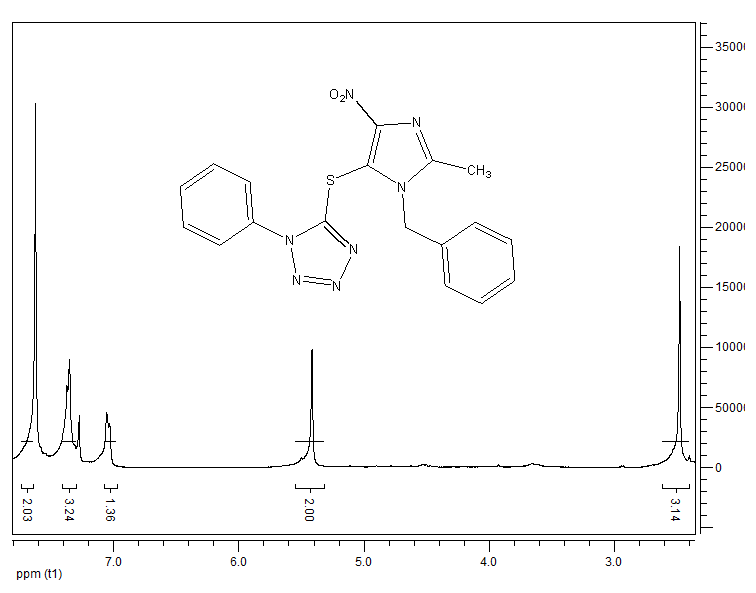


**Fig. S31**. 1H NMR spectrum of **17**


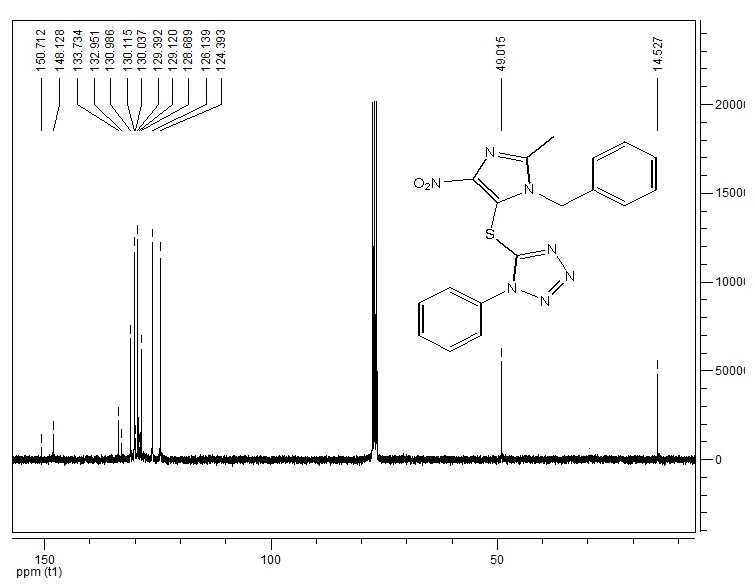


**Fig. S32**. 13C NMR spectrum of **17**


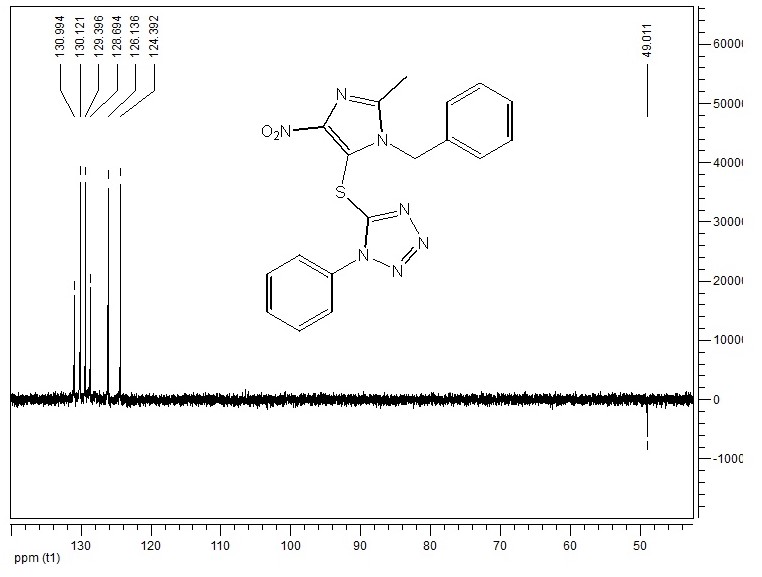


**Fig. S33**. DPET NMR spectrum of **17**


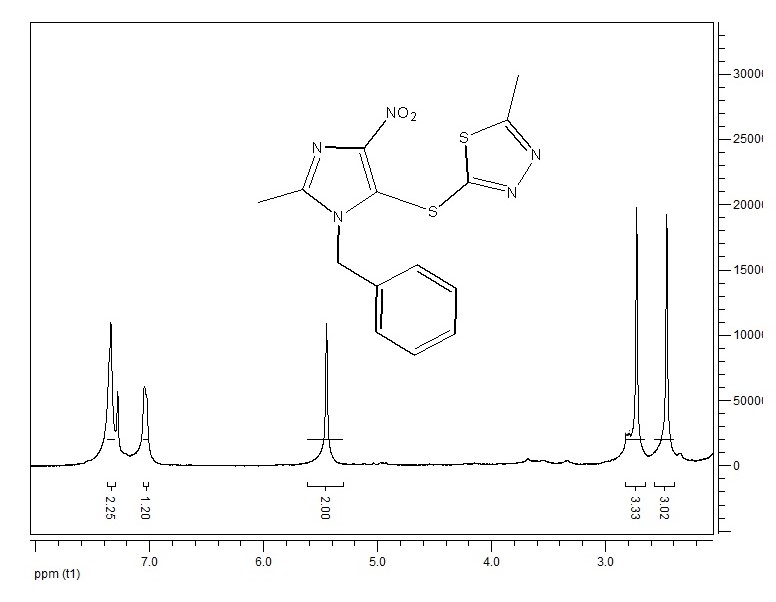


**Fig. S34**. 1H NMR spectrum of **18**


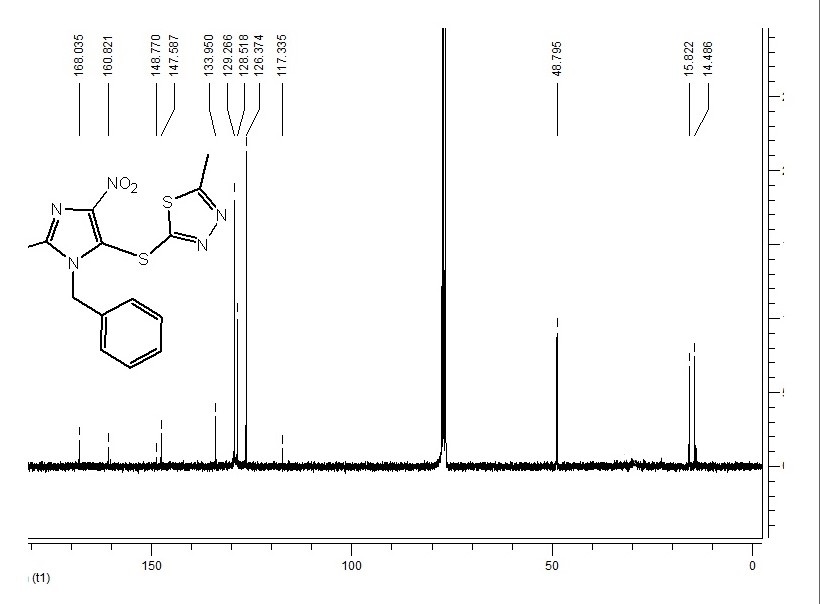


**Fig. S35**. 13C NMR spectrum of **18**


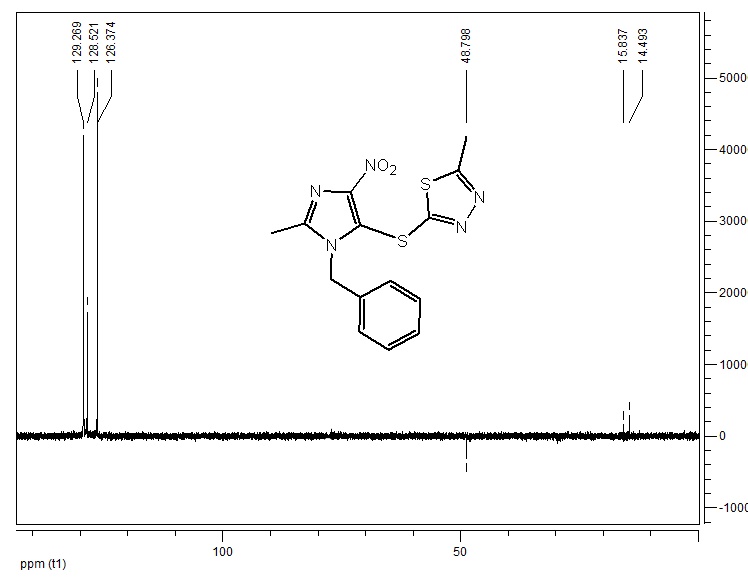


**Fig. S36**. DPET NMR spectrum of 1**8**
